# Supplementary material for: Effect of sodium ( S )-2-hydroxyglutarate in male, and succinic acid in female Wistar rats against renal ischemia-reperfusion injury, suggesting a role of the HIF-1 pathway
Source: PeerJ journal article supplement (doi:10.7717/peerj.9438), 2020-07-10

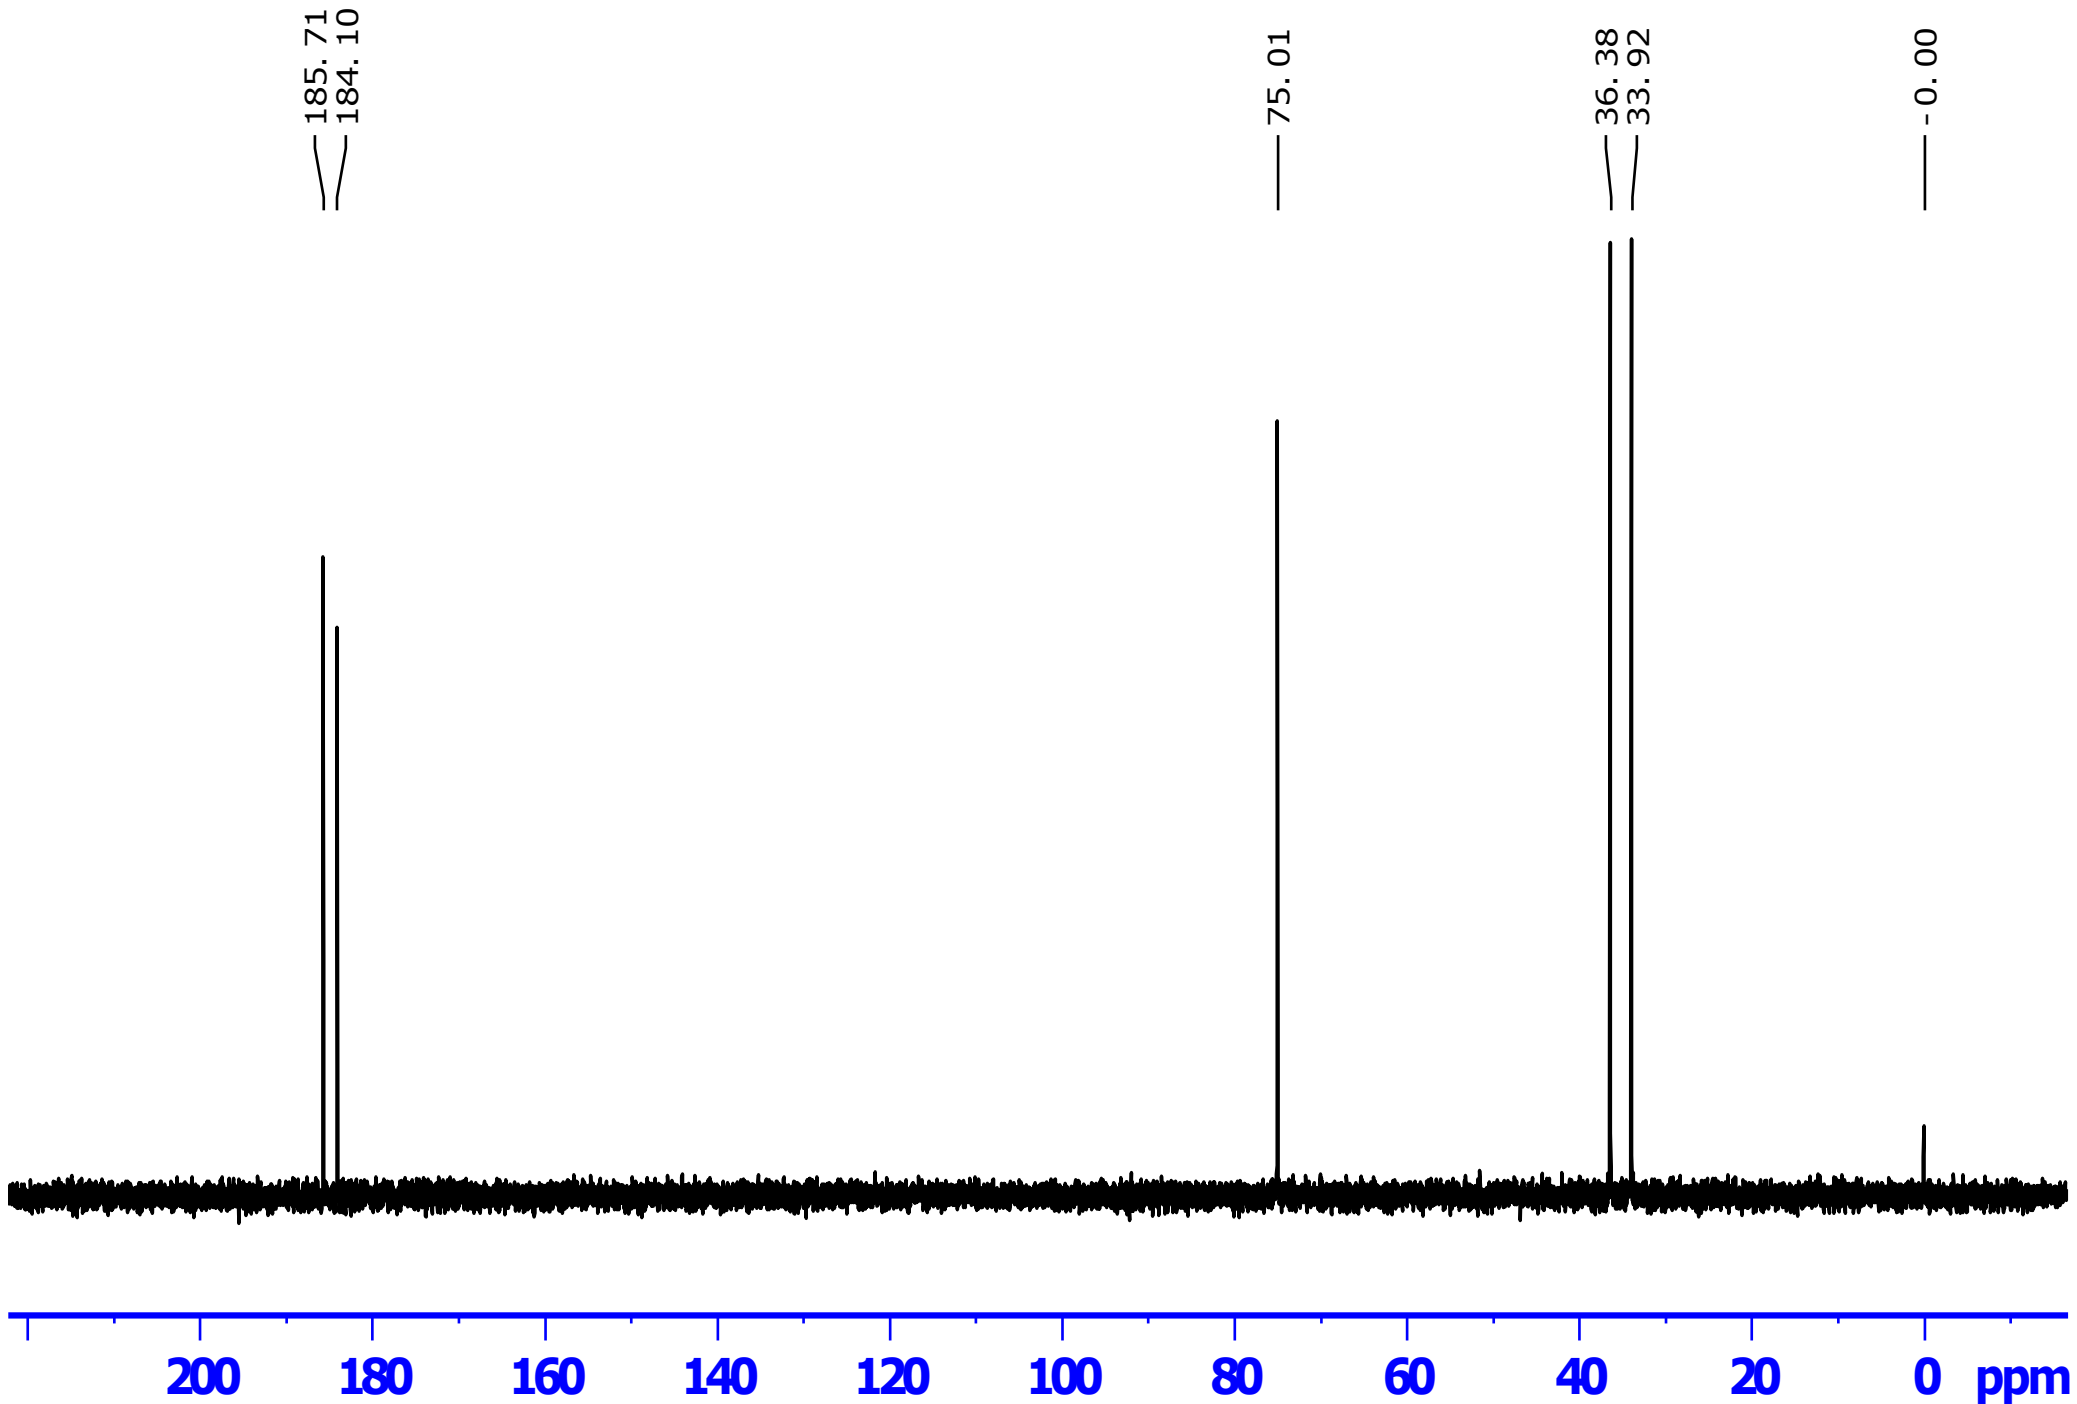

Supplement: Figure_S2.pdf [file Figure_S2.pdf]
