# Supplementary material for: Effect of sodium (S)-2-hydroxyglutarate in male, and succinic acid in female Wistar rats against renal ischemia-reperfusion injury, suggesting a role of the HIF-1 pathway
Source: PeerJ. 2020 Jul 10;8:e9438. doi: 10.7717/peerj.9438 (PMC7357568; doi:10.7717/peerj.9438)
Supplement: Supplemental Information 1 — The raw data show all the measurements of kidney and liver injury biomarkers, biomarkers of oxidative stress, proinflammatory cytokines, renal histopathology, tissue HIF-1α concentrations assessed by ELISA and Western blot, and Hmox1 expression. These data were used for statistical analysis to discard any nephro- or hepatotoxic effect and to evaluate the effect of (S)-2-hydroxyglutarate and succinic acid against renal ischemia-reperfusion injury. [file peerj-08-9438-s001.xlsx]

## Sheet: Sheet1
Group	Weight (g)	ALB (g/dL)	ALP (U/L)	ALT (U/L)	AST (U/L)	BUN (mg/dL)	CREA (mg/dL)	GLU (mg/dL)	LDH (U/L)	TP (g/dL)	URIC (mg/dL)	SOD (% inhibition)	MDA (umol/g)	IL-1b (ng/mL)	IL-6 (ng/mL)	TNF-a (ng/mL)	Tubular necrosis	Acidophilic casts	Vascular congestion	HIF-1α (ng/g)	Hmox1 expression (Fold change from SH)		Group (pools)	HIF-1α (Fold change from SH)
SH	233.5	3	321	57	480	34	0.49	188	360	5.1	0.6	0.94	49.73	0.556035	4.49777	0.663753	0	0	0	6.71868	0.983508		SH	0.999884
SH	234	3.1	147	54	226	22	0.47	179	907	5.5	0.5	0.91	51.62	1.36311	4.11742	0.934085	0	0	0	6.71554	0.80509		SH	1.30015
SH	258.2	2.8	200	83	560	21	0.42	198	2080	4.9	0.8	0.94	90.57	2.12445	3.55913	1.32145	0	0	1	4.73	0.268702		SH	0.78306
SH	232	3.1	218	56	232	21	0.4	150	546	5.4	0.4	0.92	76.31	2.39078	4.65125	0.908339	0	0	1	ND	2.07758		SH	0.91691
SH	227.6	2.9	253	76	500	30	0.55	146	1320	5.3	0.6	0.95	66.94	1.15237	2.26238	0.340757	0	2	1	5.20152	ND		Mean	1
SH	273	3.2	210	203	360	25	0.54	124	930	5.4	0.6	0.91	117.7	1.38553	1.56396	0.496404	0	0	2	7.10909	0.865118		Std. Dev.	0.219131
Mean	243.05	3.01667	224.833	88.1667	393	25.5	0.478333	164.167	1023.83	5.26667	0.583333	0.928333	75.4783	1.49538	3.44199	0.777464				6.09497	1		Tox12.5	0.715223
Std. Dev.	18.2233	0.147196	58.2801	57.5062	142.693	5.39444	0.0611283	28.5546	615.574	0.225093	0.132916	0.017224	25.7535	0.667391	1.26217	0.352197				1.05641	0.661898		Tox12.5	0.574169
12.5Tox	266	3	223	65	180	16	0.52	166	1140	5.1	0.5	0.91	57.96	1.15775	3.19213	0.588855	0	0	2	11.8486	0.101526		Tox12.5	0.625603
12.5Tox	277	3.1	245	86	510	18	0.48	205	1620	5.7	0.7	0.9	61.68	2.0276	3.77711	1.33666	0	0	0	8.51827	0.767603		Tox12.5	0.704001
12.5Tox	254	3.1	325	91	420	16	0.59	169	990	5.2	0.4	0.92	127.05	1.61778	4.65347	0.763811	1	2	1	7.18488	3.10404		Mean	0.654749
12.5Tox	229	3.2	242	51	330	22	0.7	231	810	5.5	0.5	0.9	73.32	1.17927	4.35764	0.704127	0	1	0	12.8516	1.60353		Std. Dev.	0.0668965
Mean	256.5	3.1	258.75	73.25	360	18	0.5725	192.75	1140	5.375	0.525	0.9075	80.0025	1.4956	3.99509	0.848363				10.1008	1.39417		Tox25	1.11183
Std. Dev.	20.5994	0.0816497	45.2281	18.6257	140.712	2.82843	0.0963933	31.0524	347.275	0.275379	0.125831	0.00957427	32.0401	0.41318	0.647349	0.333532				2.68508	1.29499		Tox25	1.42397
25Tox	240	3	225	73	420	15	0.53	159	1050	5.6	0.4	0.91	67.33	0.601769	3.26553	0.468317	0	0	1	8.9938	2.26077		Tox25	0.935978
25Tox	246	3	267	69	390	17	0.5	154	1920	5.4	0.5	1.02	84.82	0.591008	1.11021	0.362992	0	0	0	7.75212	19.2565		Tox25	0.888054
25Tox	275	3.1	230	96	420	23	0.53	183	1410	5.8	0.8	0.93	38.04	2.56475	2.9786	2.36533	0	0	1	9.85102	21.683		Mean	1.08996
25Tox	301	3.4	259	115	690	19	0.57	226	1650	6.2	0.6	0.86	92.32	1.59357	4.30204	0.885519	0	0	0	8.77809	13.3996		Std. Dev.	0.242568
Mean	265.5	3.125	245.25	88.25	480	18.5	0.5325	180.5	1507.5	5.75	0.575	0.93	70.6275	1.33777	2.91409	1.02054				8.84376	14.15		IR	3.10165
Std. Dev.	28.1721	0.189297	20.8547	21.4379	140.712	3.41565	0.0287228	32.8684	369.358	0.341565	0.170783	0.0668331	24.1165	0.943445	1.33017	0.924483				0.862764	8.65524		IR	4.78696
IR	287	3.1	376	105	598	104	2.97	170	2522	5.4	0.4	0.95	60.89	1.98276	4.35987	0.813547	4	4	1	11.5191	113.515		IR	2.40628
IR	274	2.6	281	338	728	106	2.97	90	2626	4.5	0.3	0.93	90.54	ND	7.45694	ND	4	3	4	11.6144	204.829		IR	3.4415
IR	300	3	319	90	624	109	3.16	182	1976	5.2	0.2	0.99	73.39	4.94651	1.02124	3.03121	4	4	2	12.3421	110.49		Mean	3.4341
IR	269	3	340	224	1118	121	3.06	98	4134	5.1	1.1	0.96	153.21	1.39091	0.97675	0.410974	4	4	4	ND	ND		Std. Dev.	0.999538
IR	287	3	283	172	754	110	3.15	124	1716	5	0.3	0.95	66.03	1.49224	2.03773	0.755619	4	4	1	9.22299	82.5343		12.5+IR	0.915969
IR	259	3	361	116	660	105	3.22	137	2130	5.2	0.3	0.9	80.08	1.15686	2.45144	0.299798	4	3	2	6.86211	130.741		12.5+IR	1.57219
Mean	279.333	2.95	326.667	174.167	747	109.167	3.08833	133.5	2517.33	5.06667	0.433333	0.946667	87.3567	2.19385	3.05066	1.06223				10.3121	128.422		12.5+IR	0.885312
Std. Dev.	14.7874	0.176068	39.6013	94.4255	191.285	6.24233	0.10496	37.2545	861.469	0.307679	0.332666	0.0301109	33.912	1.56796	2.48733	1.1223				2.25623	46.0785		12.5+IR	1.34566
12.5+IR	252	3	289	76	330	79	2.11	136	630	5.6	0.4	0.93	98.58	1.33262	2.209	0.201495	2	1	1	8.90856	142.65		Mean	1.17978
12.5+IR	237	2.9	239	104	510	76	1.12	101	900	5.1	0.4	1	98.08	0.581144	2.33578	0.22373	1	4	2	10.1805	60.4484		Std. Dev.	0.335566
12.5+IR	266	3.1	245	86	390	90	2.92	147	1290	5.4	0.5	0.91	107.86	1.19811	2.03328	0.467732	3	2	2	9.34733	ND		25+IR	1.42604
12.5+IR	241	3	238	69	390	71	1.69	150	870	5	0.5	0.95	89.29	1.73884	2.40251	0.649124	2	3	2	8.1719	52.574		25+IR	2.09025
12.5+IR	240	2.9	220	124	600	68	1.68	173	420	5	0.3	0.96	86.52	1.30123	2.68944	0.41858	3	3	2	8.82726	117.736		25+IR	1.16123
12.5+IR	232	3	247	95	420	97	3.03	159	780	5.1	0.4	1.05	36.46	4.05335	3.28555	1.68774	3	3	2	8.89441	121.277		25+IR	2.44118
Mean	244.667	2.98333	246.333	92.3333	440	80.1667	2.09167	144.333	815	5.2	0.416667	0.966667	86.1317	1.70088	2.49259	0.608067				9.05499	98.9371		Mean	1.77967
Std. Dev.	12.3558	0.0752773	22.9753	19.9867	97.9796	11.2324	0.753908	24.59	292.353	0.244949	0.0752773	0.0508593	25.4843	1.2114	0.445336	0.554256				0.668	39.9819		Std. Dev.	0.589235
25+IR	249	3.1	269	107	510	50	0.81	111	990	5.6	0.6	1.07	72.86	0.913837	2.58712	0.513958	3	2	2	6.73304	90.8481
25+IR	268	2.9	258	117	690	92	1.85	111	1320	5.3	0.4	0.96	85	1.1183	3.05867	0.347194	1	2	2	9.16888	150.03
25+IR	276	3.3	288	121	630	74	1.24	137	1860	6	0.7	0.93	48.37	1.34876	1.0457	0.832857	3	2	1	4.89464	241.726
25+IR	252	3	229	149	480	68	1.3	170	1980	5.5	0.7	0.93	70.69	1.92896	2.69834	0.715245	2	2	1	6.6752	110.875
25+IR	265	2.9	246	129	600	75	1.31	152	1620	5.5	0.7	0.91	80.34	2.80149	2.90297	1.46188	3	2	1	6.52175	106.562
25+IR	252	3.2	255	74	450	75	1.97	121	870	5.5	0.5	0.91	84.17	0.978403	2.23346	0.389909	2	3	1	7.71415	ND
Mean	260.333	3.06667	257.5	116.167	560	72.3333	1.41333	133.667	1440	5.56667	0.6	0.951667	73.5717	1.51496	2.42104	0.710173				6.95128	140.008
Std. Dev.	10.8934	0.163299	20.0674	25.0153	94.2338	13.5745	0.428517	23.897	456.552	0.233809	0.126491	0.0608002	13.6578	0.729488	0.730759	0.413028				1.41689	60.8915
