# Supplementary material for: Effect of sodium (S)-2-hydroxyglutarate in male, and succinic acid in female Wistar rats against renal ischemia-reperfusion injury, suggesting a role of the HIF-1 pathway
Source: PeerJ. 2020 Jul 10;8:e9438. doi: 10.7717/peerj.9438 (PMC7357568; doi:10.7717/peerj.9438)
Supplement: Supplemental Information 2 [file peerj-08-9438-s002.xlsx]

## Sheet: Sheet1
Group	Weight (g)	ALB (g/dL)	ALP (U/L)	ALT (U/L)	AST (U/L)	BUN (mg/dL)	CREA (mg/dL)	GLU (mg/dL)	LDH (U/L)	TP (g/dL)	URIC (mg/dL)	SOD (% inhibition)	MDA (umol/g)	IL-1b (ng/mL)	IL-6 (ng/mL)	TNF-a (ng/mL)	Tubular necrosis	Acidophilic casts	Vascular congestion
SH	248	3	147	40	151	26	0.49	143	1099	5.2	0.5	0.94	76.25	0.247275	4.47611	0.680855	0	0	0
SH	235	3.2	120	77	520	19	0.54	166	917	5.5	0.9	0.97	75.36	1.12187	3.56491	0.966043	0	0	1
SH	244	3.2	153	89	318	24	0.52	154	497	5.6	0.7	0.96	79.64	1.91884	3.31676	1.43646	0	0	1
SH	222	3.2	210	101	277	25	0.48	173	1017	5.5	0.4	0.92	82.68	2.12283	4.88712	0.985448	0	2	1
SH	235	3	146	56	291	19	0.49	152	712	5.4	1	0.95	56.79	0.910451	2.52188	0.166929	0	0	2
SH	243	3.2	136	151	420	23	0.6	131	600	5.5	0.6	0.91	65.54	1.5938	1.12213	0.379203	0	0	2
Mean	237.833	3.13333	152	85.6667	329.5	22.6667	0.52	153.167	807	5.45	0.683333	0.941667	72.71	1.31918	3.31482	0.769156
Std. Dev.	9.32559	0.10328	30.679	38.8724	127.054	3.01109	0.0451664	15.1976	240.598	0.13784	0.231661	0.0231661	9.71427	0.697974	1.36528	0.458993
12.5Tox	284	3.3	161	91	450	20	0.59	206	2010	5.7	0.6	0.85	99.11	1.56936	3.54134	0.735139	0	0	0
12.5Tox	274	3.3	155	112	600	35	0.65	133	2910	5.6	0.9	0.87	85.36	3.72335	2.90964	0.601728	1	0	1
12.5Tox	236	2.9	168	78	540	35	0.58	93	2190	4.7	0.8	0.87	69.29	1.42947	1.71966	0.294532	0	0	2
12.5Tox	224	2.9	162	66	240	42	0.6	78	780	4.8	1	0.94	101.43	2.4123	4.07961	0.430868	0	0	1
Mean	254.5	3.1	161.5	86.75	457.5	33	0.605	127.5	1972.5	5.2	0.825	0.8825	88.7975	2.28362	3.06256	0.515567
Std. Dev.	29	0.23094	5.32291	19.6871	157.56	9.27362	0.0310913	57.2509	885	0.522813	0.170783	0.0394757	14.8131	1.05343	1.01495	0.19293
25Tox	264	2.9	153	110	450	25	0.58	106	860	5	0.5	0.88	74.82	2.67505	2.28017	0.578908	0	0	1
25Tox	245	3.1	143	93	570	19	0.53	164	1950	5.7	0.6	0.89	93.21	2.66249	2.62049	0.585344	0	1	1
25Tox	234	3.3	137	51	235	23	0.5	160	662	5.4	0.4	0.94	93.93	2.0536	3.18323	0.666678	0	0	0
25Tox	240	2.9	219	71	390	18	0.54	166	1140	5.1	0.6	0.93	78.57	2.44189	4.23753	0.951054	0	0	0
Mean	245.75	3.05	163	81.25	411.25	21.25	0.5375	149	1153	5.3	0.525	0.91	85.1325	2.45826	3.08036	0.695496
Std. Dev.	12.9711	0.191485	37.9122	25.7213	139.306	3.30404	0.0330404	28.775	566.365	0.316228	0.0957427	0.0294392	9.86671	0.290244	0.856624	0.174992
50Tox	246	3.2	173	139	810	21	0.6	133	1560	5.8	0.7	0.88	114.82	4.06142	5.14059	1.60407	0	0	2
50Tox	244	3.4	239	85	600	23	0.57	167	450	6.2	0.4	0.9	77.32	2.33698	4.07071	0.762641	0	0	1
50Tox	242	3.3	164	226	1200	51	0.68	155	2130	6.1	0.9	0.91	82.5	1.44651	3.00306	0.65322	1	0	0
50Tox	236	3.2	178	116	510	23	0.62	118	551	5.6	0.5	0.91	93.75	8.37657	4.38211	1.9335	0	0	1
Mean	242	3.275	188.5	141.5	780	29.5	0.6175	143.25	1172.75	5.925	0.625	0.9	92.0975	4.05537	4.14912	1.23836
Std. Dev.	4.32049	0.0957427	34.1614	60.5227	306.92	14.3643	0.0464579	21.945	811.425	0.275379	0.221736	0.0141421	16.6286	3.07852	0.886358	0.628664
IR	275.1	3.2	206	148	234	104	2.84	109	546	5.6	1.2	0.98	116.25	1.39013	5.11976	1.48879	4	2	3
IR	279.4	3.2	140	130	650	92	2.33	95	1196	5.6	1.4	0.95	80.89	1.25244	3.69287	1.19419	4	3	0
IR	185.2	2.9	230	121	702	126	2.21	88	1118	5	2	0.93	149.11	1.93517	3.26635	0.757297	3	3	3
IR	254	2.9	114	113	360	99	2.04	80	840	4.7	0.5	0.96	338.75	0.828457	4.02633	1.10246	4	2	0
IR	262	3.2	142	109	480	89	1.85	108	1530	5.3	0.4	1	84.64	1.73953	3.5494	0.0793145	3	2	3
IR	252	2.9	170	200	990	111	2.58	72	2940	5.2	0.9	0.97	103.57	1.83534	ND	ND	3	2	0
Mean	251.283	3.05	167	136.833	569.333	103.5	2.30833	92	1361.67	5.23333	1.06667	0.965	145.535	1.49684	3.93094	0.924412
Std. Dev.	34.198	0.164317	43.9591	33.9259	270.303	13.6051	0.36019	14.9265	841.872	0.350238	0.598888	0.0242899	97.8271	0.42035	0.718736	0.539705
12.5+IR	285	3.1	127	129	720	77	1.67	85	1440	5.4	0.5	0.91	62.86	1.69042	2.21789	0.45954	3	3	0
12.5+IR	255	2.8	198	146	750	85	1.38	107	1650	5	0.6	0.91	99.46	1.59895	1.22809	0.551992	2	3	2
12.5+IR	240	3.2	147	101	660	77	1.38	93	1020	5.2	0.4	0.93	62.5	0.94612	2.72725	0.379961	3	1	2
12.5+IR	236	3	192	232	780	93	1.68	107	1020	5.1	0.6	0.92	76.61	0.718346	1.67072	0.0634027	4	2	2
12.5+IR	235	3.13	171	89	600	77	1.56	123	1050	5.4	0.6	0.91	58.04	0.982887	3.47238	0.374695	3	2	2
Mean	250.2	3.046	167	139.4	702	81.8	1.534	103	1236	5.22	0.54	0.916	71.894	1.18735	2.26327	0.365918
Std. Dev.	21.0404	0.155177	30.0083	56.4385	72.2496	7.15542	0.148257	14.6287	291.942	0.178885	0.0894427	0.00894427	16.9109	0.43083	0.880625	0.183833
25+IR	244	3.4	156	118	690	96	1.89	82	938	5.6	0.4	0.91	54.64	1.04745	2.85848	0.289265	3	3	1
25+IR	239	3.2	184	94	600	48	1.24	89	2370	5.6	0.7	ND	63.75	ND	ND	ND	3	4	0
25+IR	236	2.9	152	208	1650	79	1.69	103	2070	5.2	0.5	0.95	100.36	1.76395	2.87405	0.422091	4	2	4
25+IR	278	2.9	176	120	630	101	2.36	72	2040	5	1	0.97	60.36	0.844787	2.54931	0.461881	4	3	2
25+IR	253	2.9	237	135	630	109	2.21	104	1560	5.1	0.5	0.83	61.61	0.484295	1.08352	0.0201026	3	3	1
25+IR	266	2.8	260	99	570	101	3.17	157	2040	5.1	0.3	0.72	89.11	1.23667	1.40826	0.321448	4	3	3
Mean	252.667	3.01667	194.167	129	795	89	2.09333	101.167	1836.33	5.26667	0.566667	0.876	71.6383	1.07543	2.15472	0.302958
Std. Dev.	16.4884	0.231661	44.355	41.4825	420.749	22.441	0.659717	29.9828	511.023	0.265832	0.250333	0.102372	18.4885	0.475258	0.847513	0.173195
50+IR	245	3	166	108	660	89	1.66	94	780	5.1	0.4	ND	ND	0.716007	2.36321	ND	3	2	4
50+IR	237	3	261	109	630	96	2.26	66	1380	5.1	2.1	0.96	140.54	ND	ND	3.32888	4	2	3
50+IR	235	3.1	145	116	870	96	2.68	87	2760	5.2	0.9	0.87	85.89	0.377582	0.32059	0.278148	4	2	4
50+IR	276	2.9	253	115	630	108	3.16	157	1530	5.4	0.4	0.93	87.5	1.20169	2.49593	0.325544	4	4	0
50+IR	256	2.8	365	160	360	100	2.59	29	1830	5	0.8	0.92	113.21	0.519268	2.18008	0.217294	4	2	3
50+IR	259	3	253	208	360	120	3.1	119	2430	5.2	0.5	0.89	85.18	1.34966	2.41363	0.291606	4	2	2
Mean	251.333	2.96667	240.5	136	585	101.5	2.575	92	1785	5.16667	0.85	0.914	102.464	0.832841	1.95469	0.888294
Std. Dev.	15.5005	0.10328	78.6174	40.284	196.036	10.9864	0.559562	43.8817	722.184	0.136626	0.647302	0.0350714	24.3034	0.424967	0.920807	1.36489
